# Supplementary material
Source: ML conference proceedings conference paper supplement (https://openreview.net/forum?id=7eLE4mfEpz)
Supplement: supplementary_material [file JOSH3R.pdf › JOSH3R.pdf]

Ground-Truth

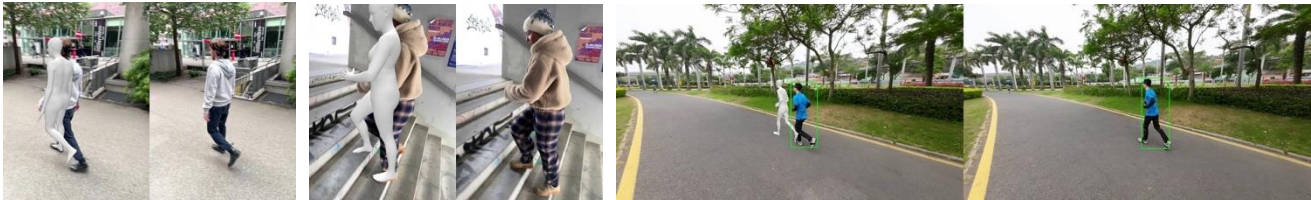

JOSH3R

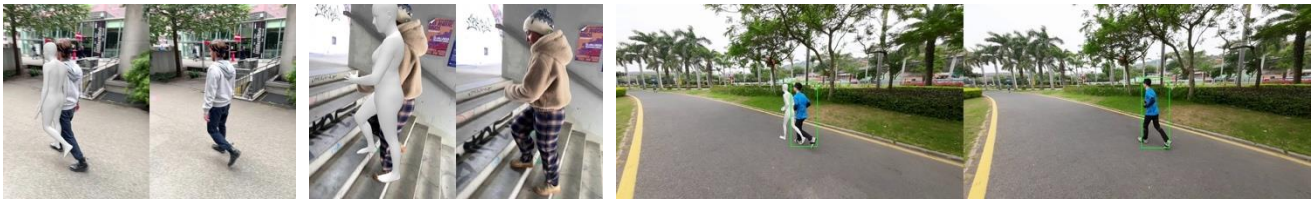

Qualitative Results of JOSH3R: We project the human pose of the right frame onto the left frame's coordinate
